# Supplementary material
Source: HighWire-hosted journal article supplement (https://gut.bmj.com/highwire/filestream/192082/field_highwire_adjunct_files/0/228437appendix.docx)
Supplement: 228437appendix.docx [file 228437appendix.docx]

**Appendix 1**

**Participating Hospitals**

**ENGLAND Consultant Lead, Audit Leads, Case Identifiers**

**Addenbrookes Hospital (79)** Dr E Cameron Dr E Bird-Lieberman Ms G Whiting, Mrs C Darler **Aintree University Hospital (54)** Dr R Sturgess Dr S Hood **Airedale General Hospital (53)** Dr C J Healey Dr S Miller Dr I Khan Ms C Booton **Alexandra Hospital,Redditch (2)** Dr D Aldulaimi Ms C Badger **Arrowe Park Hospital Wirral (128)** Dr B Oates Dr K Anim-Somuah Ms E Scott Dr K Anim-Somuah **Barnet Hospital (58)** Dr K H Tang Dr S Mehta Dr R Dissanayaka Dr H Williams Dr M Shah **Basildon University Hospital (40)** Dr D Gertner Dr Z Mazhar Dr A Naeeb **Basingstoke & North Hampshire Hospital (35)** Dr C Brooks Dr M Gwiggner Ms C Bagan **Bassetlaw District General Worksop (33)** Dr G Hill Dr J Sayer Dr R Dawood **Bedford Hospital (35)** Dr R Harvey Dr A Wiles Ms J West **Birmingham Heartlands (41)** Dr T Ngatchu Dr YS Aung Sister K Upton **Blackpool Victoria Hospital (46)** Dr C J Shorrock Dr N Prasad Ms J Porter **Bradford Royal Infirmary (45)** Dr C Beckett Dr C Flynn Ms L Nanson Dr R King Dr N Patel, Dr M Thida Dr L Owen, Dr Y Kamal Dr C Taylor, Dr D Storey **Bristol Royal Infirmary (66)** Dr A McCune Mr P Sylvester SN K Caddick, Dr M Dastaran **Broomfield Hospital (7)** Dr C McCartney Dr K Khalid Ms H Clarke **Calderdale Royal Hospital (106)** Dr A Verma Dr G Singh Ms J Mason **Chelsea & Westminster Hospital (3)** Dr M Banks Dr H Antoniades Sister C Gosling **Cheltenham General Hospital (58)** Dr J Anderson Dr J Falvey Ms V Coyle **Chesterfield Royal Hospital (31)** Dr R Collin Dr R Collin Ms L Howlett **Chorley & South Ribble Hospital (44)** Dr I Drake Dr A Khawaja Ms S Baxter, Dr H Hatab **City Hospital Birmingham (48)** Dr M Anderson Dr A Elagib Mr J Singh **Colchester General Hospital (59)** Dr D O'Riordan Dr S Tanwar Ms E Smith **Conquest Hospital (31)** Dr M Whitehead Dr N Rahman Dr M Blaszczynska Mrs. G. Falconer **Countess of Chester Hospital (65)** Mr D Monk Dr H Dallow Ms P Davenport-Ball **County Hospital, Hereford (38)** Dr R Ransford Dr R Desai Ms V Bailey **Darent Valley Hospital (14)** Dr R Ede Dr R Sweis Mr L Delieu, Ms S Lockwood **Darlington Memorial Hospital (27)** Mr K Gunning Ms J Ryan Mrs J Dent **Derby City Hospital (84)** Dr R Cunliffe Dr R Armstrong Dr B Orford, Dr V Monnelly **Derriford Hospital,Plymouth (83)** Dr A Copplestone Dr M Metzner Ms J Cooke **Dewsbury & District Hospital (83)** Dr N Sivaramakrishnan Dr V Hegde Dr A Uddin **Diana, Princess of Wales Hospital Grimsby (30)** Dr S Moss Dr Ghosh, Ms J Tickle Mr J Darley **Doncaster Royal Infirmary (88)** Dr G James Dr J Sayer Dr R Westbrook **Dorset County Hospital (65)** Dr S Bridger Ms A Cocks **Ealing Hospital (4)** Dr J Arnold Dr J Arnold Ms J Wilk **East Surrey Hospital (21)** Dr J Stenner Dr N Chong Ms S Cuming Dr C Shekhar **Eastbourne District General Hospital (22)** Dr A Dunk Dr J Ryan Ms G Falconer **Edith Cavell Hospital (2)** Dr S Nair Dr G Corbett Ms K Bowen **Epsom General Hospital (14)** Mr S Y Farhat Dr S Moodie Dr P Patel **Fairfield General Hospital (39)** Dr N Haslam Dr K Hng Ms M Nolan **Freeman Hospital (18)** Dr K Oppong Dr V Mahesh Mr S Stoker **Friarage Hospital Northallerton (37)** Dr J Hancock Dr D Craig Dr S Subramanian **Frimley Park Hospital (20)** Dr S Langlands **Furness General Hospital Barrow (20)** Dr C Brown Dr J Keating Ms B Teague, Ms H Pratt Dr P Ellel **George Eliot Hospital,Nuneaton (7)** Dr G Wood Dr P Sambaiah Mr P Ryan **Good Hope Hospital (26)** Dr C Lim Dr S Kothuri **Hammersmith Hospital (73)** Prof. S Ghosh Dr D Westaby Dr N Galletly Ms J Camsell, Ms H Sklar, Mr A Thillanaiyagam **Hemel Hempstead General Hospital (30)** Dr A King Dr S Zeki Ms S Gunn **Hexham Hospital (3)** Dr E Phillips Mr D Scott **Hinchingbrooke Hospital (13)** Dr P Roberts Dr M Thoufeeq Ms B Anderson **Homerton University Hospital (24)** Dr A Ballinger Dr A Idowu Ms R Halliday **Hope Hospital Salford (25)** Dr C Babbs Dr K Peddi Ms S Stickova **Huddersfield Royal Infirmary (48)** Dr G Sobala Dr J Alyousofi Mr C Duffield **Hull Royal Infirmary (57)** Dr M Dakkak Dr H Reddy Dr Y Khiyar Dr D Leaning Sister E Arksey, SN J Brady, Ms JButler, Ms S Shepheard, Mr M Padgett,Ms D Pinchon **Ipswich Hospital (134)** Dr M Bose Ms A Sayer Ms S Loftus,Ms P Bradley **James Cook University Hospital (121)** Dr H Dallal Dr H Dallal Ms E Carter **James Paget University Hospital (47)** Dr M Williams Dr L Scovell Mr S Wright **Jersey General Hospital (15)** Dr D Ng Dr E Wesley **Kent & Canterbury Hospital (60)** Dr S Barton Dr F Muller Ms P Young, Mr R Woods **Kent & Sussex Hospital (34)** Dr A Harris Dr T Demetriou Ms A Davies **Kettering General Hospital (40)** Dr A Chilton Dr D Rogers Dr J Cowdery **King George Hospital (34)** Dr S Grainger Dr U Afzal Ms E Bradley **Kings College Hospital** Dr I Bjarnason Dr K Jamil Dr A Loganayagam **Kings Mill Hospital Mansfield (17)** Dr R Logan Dr A Norman Ms N Singleton **Kingston Hospital (78)** Dr T Heymann Dr S Ralphs Ms D Sayers **Leeds General Infirmary (109)** Dr S Everett Dr M Barron Dr R Henney, Dr A Costello Mr R Young **Leicester General Hospital (40)** Dr J DeCaestecker Mr C Barbrook **Leicester Royal Infirmary (40)** Dr P Wurm Dr S Tsao Dr J Williams Mr C Barbrook **Lincoln County Hospital (57)** Dr G Spencer Dr S Foley Ms S Sinha **Lister Hospital Stevenage (39)** Dr M Carter Dr P Trembling Mrs T Sutton **Macclesfield District General Hospital (12)** Dr K Koss Dr J Berry **Manor Hospital Walsall (37)** Dr S Manjunatha Dr S Putta Ms L O Shea Dr H Padmanabhan **Mayday University Hospital (78)** Dr M Mendall Dr S Gupta Dr V Gunasekera **Milton Keynes General Hospital (78)** Dr R Madhotra Dr C Akubine Dr A Wahla **New Cross Hospital Wolverhampton (104)** Dr I Perry Dr E Stretton Ms D Pickford **Newham University Hospital (16)** Dr U Beejay Dr Y Sharifi Dr Y Sharifi, Dr M Crofts **Nobles Hospital IOM (19)** Dr S Stock Ms G Hattersley **Norfolk and Norwich University Hospital (48)** Dr R Tighe **North Devon District Hospital (52)** Dr A Moran Dr C Sieberhagen Mrs P Giles **North Manchester General University Hospital (32)** Dr X McFarlane Ms M Nolan Dr A Conlin Dr J Iqbal **North Middlesex University Hospital (59)** Dr A Millar Dr H Deeney,Dr R Dor Ms K Thornton,Ms C Apps **North Tyneside Hospital (62)** Dr M Hayat Ms S Hope, Ms R Tate **Northampton General Hospital (48)** Dr A Ogilvie Mrs A Jeffrey, Mrs M Kears Mrs S Fleckney **Northwick Park Hospital (63)** Dr M Jacyna Dr C Wadsworth **Nottingham City Hospital (48)** Dr K Teahon **Peterborough Hospital (53)** Dr S Nair Dr G Corbett Ms K Bowen, Dr S Harris,Dr M Surti **Pilgrim Hospital (10)** Dr M Perry Ms K Collier, Ms S Sinha **Pinderfields & Pontefract Hospitals (109)** Dr S Shah Dr D Vani Ms M Travis **Poole Hospital (50)** Dr J Snook Dr N Sharer Ms S Chessell Mrs C Howard Ms J Delargy **Princess Alexandra Hospital (53)** Dr R Phillips Dr D Arokiananthan Dr A Fikree Mr A Dixon **Princess Elizabeth Hospital, Guernsey (7)** Dr P Mullen Ms E Downey Ms E Downey **Queen Alexandra Hospital, Portsmouth (30)** Dr A Quine Dr D Pearl Mr T Johns **Queen Elizabeth Hospital, Birmingham (9)** Dr R Walt Dr T Iqbal Dr M Heydtmann **Queen Elizabeth Hospital,Gateshead (66)** Dr J Singh Dr M Kasimanickam Ms J Rutter **Queen Elizabeth Hospital, Kings Lynn (24)** Dr A Dowds Dr K ElaminDr R Hariraj **Queen Elizabeth Hospital, Woolwich (41)** Dr J Dunn Dr J Felber Dr A McNair Dr V Saxena **Queen Elizabeth II Hospital Welwyn Garden City (28)** Dr P McIntyre Dr A Kent Ms L Sibthorpe, Ms F Mane Ms A Smout **Queen Elizabeth The Queen Mother Hospital Margate (23)** Dr A Piotrowicz Dr K Manoj Ms M Pickard **Queen Mary's Hospital,Sidcup (15)** Dr H Curtis Dr E Lanning **Queens Medical Centre,Nottingham (38)** Dr A Jawhari Prof R Logan Dr J Bebb Dr T Monaghan Dr M Williams Dr J Thomas **Queen's Hospital, Burton on Trent (1)** Dr A Palejwala Ms A Joy **Queens Hospital, Romford (50)** Dr P Premchand Dr N Jawad Dr N O'Shea Ms E Bradley, Ms M Haywood Mrs S Poulten **Rochdale Infirmary (12)** Dr R George Dr M El Sadig Ms L Cooper **Rotherham Hospital (134)** Dr P Basumani Dr M Yousif Ms L Bowden **Royal Albert Edward Infirmary (60)** Dr P Bliss Dr M Dibb Mrs D Joyce, Ms L McCreery **Royal Berkshire Hospital (55)** Dr J Simmons Dr P Allan Ms L Milsom **Royal Bolton Hospital (47)** Dr G Lipscomb Dr E Bolton Ms K Shepard **Royal Devon and Exeter Hospital (129)** Dr R Ayres Dr V Pearce Ms L Moore **Royal Free Hospital (45)** Prof O Epstein Dr R Njie Ms L Boxer **Royal Hampshire County Hospital Winchester (44)** Dr H Shepherd Dr J Saunders Dr A Jamil Ms F Geal **Royal Lancaster Infirmary (38)** Dr C Brown Dr C Selinger Ms B Teague, Ms H Pratt Dr C Henson **Royal Liverpool University Hospital (85)** Prof. A Morris Dr M Lombard Dr L Turtle Dr C Musumba Miss H Parry, Mr A Houghton Ms P Birch Ms J Machin **Royal Oldham Hospital (31)** Dr B Rameh Dr S Balakrishnan Dr A Gebril **Royal Preston Hospital (35)** Dr S Cairns Dr M Musa Ms S Baxter Dr F Mohammed **Royal Shrewsbury Hospital (21)** Dr J Jones Dr D Wozniak Ms S Allen, Ms R Hayton Dr L Petitt **Royal Surrey County Hospital (53)** Dr C Tibbs Dr M Fullard Ms T Mansfield **Royal Sussex County Hospital (102)** Dr S Cairns Dr P Blaker Ms R Wheeler, Ms E Cox,Dr A McCelland Dr S Patel **Royal United Hospital Bath (12)** Dr D Robertson Dr D Gavin Sister T Thresher Dr J Linehan **Royal Victoria Infirmary,Newcastle (149)** Dr K Matthewson Dr C Mountford Mr S Stoker **Russells Hall Hospital Dudley (56)** Dr B Jones Dr I Williams Ms K Obrenovic **Salisbury District Hospital (32)** Dr J Loehry Dr A Muddu Ms M Thorrowgood **Sandwell General Hospital (2)** Dr C Cobb Dr C Cobb Dr C Cobb, Dr J Mannath **Scarborough General Hospital (73)** Dr C Mitchell Dr S Riyaz Dr J Storey Mr B Ellison, Ms A McKee, Ms J Walker **Scunthorpe General Hospital (1)** Dr P Mysore Dr P Sutherland, Mr J Daws, Ms L Barsley **Selly Oak Hospital (34)** Dr R Walt Dr J Goh Dr E Campbell **South Tyneside District Hospital (57)** Dr S Panter Dr J Khan Ms A Bartholomew Ms N Lloyd **Southampton General Hospital (13)** Dr M Wright Dr V Gamba **Southend University Hospital (42)** Dr G Bray Dr J Goodhand Ms Y Townsend **Southmead Hospital (8)** Dr S Hughes Dr M Musa **Southport & Formby District General Hospital (46)** Dr G Butcher Mr T Heathcote Dr M Fox Mr V Fletcher Dr A Bonnett **St George's Hospital London (42)** Mr R Leicester Dr C Groves Dr S Musa **St Helier Hospital Jersey (56)** Dr S Zar Dr C Tee, Dr M Afzal, Dr D Ghosh **St James University Hospital (105)** Dr G Robins Dr J Hutchinson Dr M Armstrong **St Mary's Hospital Paddington (54)** Dr J Hoare **St Peter's Hospital Chertsey (69)** Dr P Finch Dr C Banks Mrs A Clifford **Stafford General Hospital (115)** Dr S Hearing Dr B Theron Ms A Worraker **Stepping Hill Hospital (47)** Dr N Ahluwalia Dr C Blood Mr A Riley **Stoke Mandeville Hospital (51)** Dr M Wheldon Dr A Naziat, Ms L Oswald Ms S Cooper **Sunderland Royal Hospital (1)** Dr D Nylander **Tameside General Hospital (38)** Dr K Siddiqui Ms M Tate **Taunton and Somerset Hospital (80)** Dr P Thomas Dr E Greig Ms N Durant **The Great Western Hospital (17)** Dr A Sternberg Ms S Caldwell Ms N Basharat Ms H Cooper **The Hillingdon Hospital Uxbridge (4)** Dr G Holdstock Mr M Troup **The Horton Hospital Banbury (13)** Dr A Ellis Dr R Palmer **The John Radcliffe Hospital Oxford (63)** Dr S Travis Dr O Brain Dr J Corcoran Mr L Rhodes Ms H Bainbridge **The Luton & Dunstable Hospital (19)** Dr S Jain Dr A Shankar Mr D Grierson-Hill Ms E Morris **The Princes Royal Hospital Telford (70)** Dr J Jones Dr S Ahmed, Ms R Hayton Dr R Kontautaite **The Royal Bournemouth Hospital (48)** Dr P Winwood Dr B Chadwick Ms H Baker **The Whittington Hospital London (121)** Dr D Suri Dr D Lindo Ms L Kelly **Torbay Hospital (41)** Dr J Lowes Dr R Ramnarace Mr M Francis, Mr S Pearce **Trafford General Hospital (4)** Prof C Summerton Dr Z Mehdi **University College Hospital London (21)** Dr A Hatfield Dr L Langmead **University Hospital of Hartlepool (24)** Dr J Vasani Dr S Chatterjee Ms J Butt **University Hospital of North Durham (46)** Dr P Moncur Ms D Watson **University Hospital of North Staffordshire (35)** Dr A Brind Dr G Moran Ms P Kelsall **University Hospital of North Tees (93)** Dr M Rutter Dr T Lee Ms P Green Ms J Pearson **Wansbeck Hospital Ashington (3)** Dr A Bhagwat Dr D Waddington Ms R Tate **Warrington Hospital (19)** Mr M Brett Dr S Narreddy Ms V Brash **Warwick Hospital (18)** Dr P C Hawker Dr L Claridge Ms R Walczak-Doughty **Watford General Hospital (25)** Dr A Leahy Dr Q Ainstee Ms A Wood **West Cumberland Hospital (24)** Dr Z Mahmood Dr R Jaiswal Sr M Linstead **West Middlesex University Hospital (45)** Dr I Beveridge Dr A Humphries Ms M Wu Dr N Direzke **Westmorland General Hospital (5)** Dr C Brown Dr D Moothoos Ms B Teague, Ms H Pratt **West Suffolk Hospital (16)** Dr S Whalley Dr K Sheikh, Ms L Watson **Weston General Hospital (64)** Dr D R Parker Dr T Valiani Dr T McGavin **Wexham Park Hospital Slough (81)** Dr S Levi Dr F Hossain Ms B Johnston **Whipps Cross University Hospital London (68)** Dr A Sawyerr Dr G Osuoha Ms J Henderson **Whiston Hospital Liverpool (22)** Dr J Mclindon Dr R Chandy Mr B Collins **William Harvey Hospital (18)** Dr D Austin Dr A Dhiman **Worcestershire Royal Hospital (5)** Dr N Hudson Dr D Adulaimi Ms C Badger **Worthing Hospital (36)** Dr K Thompson Ms P Beacher Dr S Kreise **Wycombe Hospital (41)** Dr A McIntyre Dr C Green Ms L Oswald Ms S Cooper **Wythenshawe Hospital (51)** Dr G Hyde Dr R Keld Dr R Lim Dr P Smith Mr G Biddlecombe Dr S Murugesan **Yeovil District Hospital (38)** Dr Z Khan Dr M Sproat Ms C Mitchell **York Hospital (92)** Dr J Turvill Dr G Sivaji Mrs M Norton

**SCOTLAND Dumfries & Galloway Royal Infirmary(20)** Dr F Ashkanani Dr D Kidder Dr J K Apollos **Belford Hospital Fort William (2)** Dr B Tregaskis **Borders General Hospital (32)** Dr J Fletcher, Dr C Evans Ms L Hall **Gartnavel General Hospital Glasgow (9)** Dr D Gillen Dr J MacDonald **Glasgow Royal Infirmary (12)** Dr J Morris **Hairmyres Hospital East Kilbride (104)** Dr T Reilly Dr H Mackie Dr G Masterton **Lorn & Islands District General Hospital Oban (6)** Dr S Yadav **Ninewells Hospital Dundee (72)** Dr N Reynolds Dr H Younger, Dr M Groome **Perth Royal Infirmary (8)** Dr N Reynolds Dr J Cotton Dr A Smith **Queen Margaret Hospital Dumfermline (37)** Dr N Church Dr H Jafferbhoy Ms C Gilvear Mr A Macdonald **Royal Infirmary of Edinburgh (29)** Dr C Blair Dr K Trimble Dr D Gilbert Ms D Needham **Southern General Hospital Glasgow (35)** Dr H Suzuki, Dr J Manning **Stirling Royal Infirmary (161)** Dr H Dalziel Dr D Morales Mr L Simpson **Stobhill Hospital Glasgow (12)** Dr A Cahill **Victoria Hospital Kircaldy (14)** Dr J Wilson Dr K Vaidya, Dr G Birnie **Victoria Infirmary Glasgow (38)** Dr R Boulton- Jones Dr G Naismith Ms S Shields **Western General Hospital Edinburgh (7)** Dr I Penman Ms A Henderson Dr J Ferguson

**NORTHERN IRELAND Antrim Area Hospital (17)** Dr C Rodgers Dr H Ferguson **Belfast City Hospital (48)** Dr B Johnston Dr N McDougall Dr G Morrison Dr N Kelly Dr C Ferguson B Craig J Shaw-O Doherty **Daisy Hill Hospital (30)** Mr A Black Mr E Smyth **Erne Hospital (37)** Dr M Killen Dr E Ghareeb **Mid-Ulster Hospital (6)** Dr N Patterson Dr J Addley **Royal Victoria Hospital Belfast (41)** Dr S Atkinson **The Ulster Hospital (108)** Dr G Caddy Dr P Allen Ms J Hall, Dr C Lam, Dr Strzelecka, Ms B Allen **Tyrone County Hospital (1)** Dr M Killen Dr E Ghareeb

**WALES Bronglais General Hospital (12)** Dr M Narain Dr D Othman Ms M Edwards Dr S Manning **Glan Clwyd Hospital Rhyl (37)** Dr I Finnie Dr L Sunderraj Ms E Hughes **Llandough Hospital Cardiff (34)** Dr J Green Dr J Turner Ms A Ball, Dr C Jones Dr S Clarke, Dr N Khan **Morriston Hospital Swansea (33)** Dr P Duane Dr K Tirou Mrs A Parcell **Neath Port Talbot Hospital (26)** Dr C Lai Ms C Havard Sister J Crowther **Nevill Hall Hospital Abergavenny (38)** Dr P Neville Dr C Pritchard Dr C Hewkins **Prince Charles Hospital Merthyr Tydfil (29)** Dr M Patel Dr D Joy, Dr M Khanji, Mr Kumar **Singleton Hospital Swansea (30)** Dr C Ch'ng Dr C Hunt **University Hospital of Wales Cardiff (39)** Dr B Hawthorne Ms J Jones Ms A Ball **Withybush General Hospital Haverfordwest (43)** Dr A Vaishnavi Dr V Sankar Ms C Williams **Wrexham Maelor Hospital (22)** Dr T Mathialahan Dr J Hender **Ysbyty Gwynedd Hospital Bangor (39)** Dr W Ahmed Dr J Gasem, Dr K Mottart Ms T Jones.
